# Supplementary material
Source: PubMed Central journal article supplement (PMC2822489)
Supplement: 00122.2009_1.pdf [file 00122.2009_1.pdf]

**A**

CTX  
Day 14

CTX IR  
Day 14

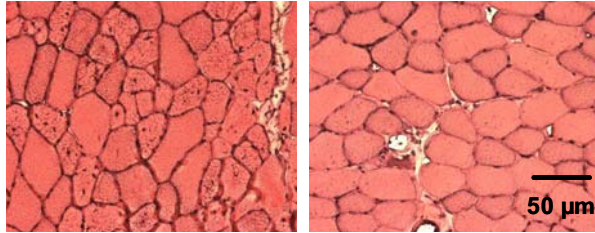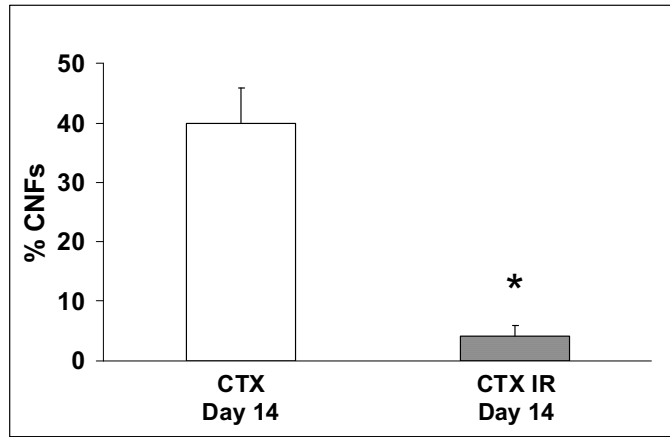

**B**

CTX  
Day 5

CTX IR  
Day 5

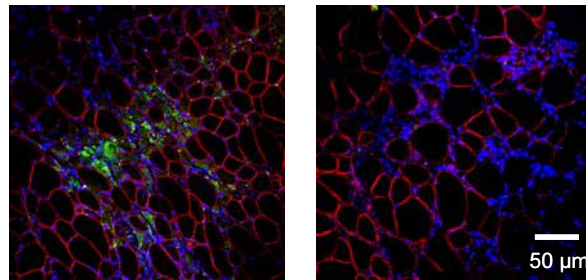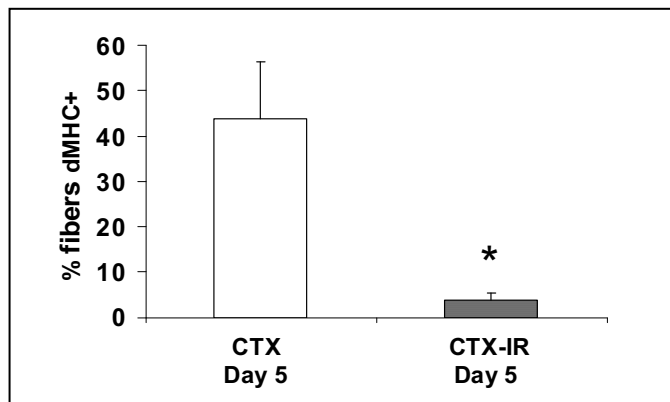

**Supplementary Figure 1. Myogenic response to cardiotoxin (CTX) and inhibition of myogenesis by irradiation.**

Panel A shows representative images of unirradiated and irradiated tibialis anterior (TA) muscles of A/WySnJ mice 14 days after CTX injection. H&E stained cross sections show a large number of centrally nucleated fibers (CNFs), indicative of myogenesis, in unirradiated TA muscles but not in irradiated TA muscles. Counts of CNFs from 2 irradiated mice and 2 unirradiated mice are presented in the graph below, where \* denotes a significant difference with  $p < 0.0001$ .

Panel B shows representative images of unirradiated and irradiated TA muscles of A/WySnJ mice 5 days after CTX injection. Cross sections labeled with antibodies to developmental myosin (dMHC, green) show many dMHC+ fibers in unirradiated TA muscles, indicative of myogenic activity. Irradiated muscles do not show such an increase in dMHC+ fibers. Sections were co-labeled with antibodies dystrophin (red) to visualize the margins of the myofibers, and with DAPI to identify the nuclei (blue). Counts of dMHC+ cells from 2 irradiated mice and 2 unirradiated mice are presented in the graph below, where \* denotes a significant difference with  $p < 0.0001$ .
